# Supplementary material for: Isolation of Subtype 3c, 3e and 3f-Like Hepatitis E Virus Strains Stably Replicating to High Viral Loads in an Optimized Cell Culture System
Source: MDPI journal article supplement (doi:10.3390/v11060483), 2019-05-28
Supplement: s1 [file s1]

## Primers used for whole genome sequencing

| Primer       | Sequence (5' – 3')             | Binding position<br>(on 14-16753 genome) |
|--------------|--------------------------------|------------------------------------------|
| ‡ 5'-RACE_s  | AAGCAGTGGTATCAACGCAGAGTACGCGGG | on 5' (dCTP) <sub>n</sub> tail           |
| † 1_s        | GCAGACCACGTATGTGGTCGA          | 2 – 22                                   |
| S_s          | CGGCCAATTCTGCCCTGG             | 94 – 111                                 |
| Sn_s         | CGAATGCTGTGGTGGTTCGG           | 112 – 131                                |
| § 5'-GS5n_as | TCTCAGTTTGTACACGGGACA          | 139 – 159                                |
| § 5'-GS5_as  | GCTGTCGGGGTTGCATCAGGTTAATA     | 164 – 189                                |
| § 5'-GS4n_as | GAAATACGAGCTGCCGGGGTTGC        | 176 – 198                                |
| 289_as       | TCTAGACAACGACCAGCCCCG          | 270 – 289                                |
| § 5'-GS4_as  | CACCGGTGCAAGACATTAGGGTTATCAT   | 316 – 343                                |
| § 5'-GS2n_as | GGGTCGGGGCAGAATACCAACGCTGT     | 371 – 396                                |
| 393_as       | TAGGAGCAGAGTACCAGCGC           | 374 – 393                                |
| 409_s        | CTAACTGCCGCCGTTCTG             | 409 – 426                                |
| 440_as       | GAGGCCACGCAAAGCAGAAC           | 421 – 440                                |
| 427_s        | CACTGCGTGGTTTGCCCC             | 427 – 444                                |
| † 2_s        | GATCGTACCTAYTGYTTTGATGG        | 450 – 472                                |
| § 5'-GS1n_as | CCCCAGTTTCTGCGGCAAATGAGC       | 484 – 507                                |
| § 5'-GS1_as  | CCGGCCAGAGGTCATGCAGAGAATAAAG   | 513 – 540                                |
| † 1_as       | GGGCCATAGCCTCBGCAACATC         | 543 – 564                                |
| 560g_s       | GGCCCGYCA YGGGATGAC            | 560 – 577                                |
| Sn_as        | CAAGCGTGTCATCCCGTGC            | 566 – 584                                |
| A_s          | CGGTGATCGTGCTGTTGTGAC          | 665 – 685                                |
| S_as         | GGTCACAACAGCACGATCACC          | 666 – 686                                |
| An1_s        | CATACTTCGTGCATGGATCCGC         | 728 – 749                                |
| 874_as       | CGAGGGTACGGAACATAAGGCA         | 853 – 874                                |
| 897_as       | ACCTAACATACACCTCCGTGA          | 876 – 897                                |
| 902g_s       | ATTYGGCCCTGGYGGGTC             | 902 – 919                                |
| F1_s         | TCATGCTGTTCCGGTCCACA           | 962 – 981                                |
| † 3_s        | CATATTTGGGACCGGCTYATGCT        | 978 – 1000                               |
| † 2_as_m1    | TAGGTCATAAGYCGTGARCAGCA        | 1032 – 1054                              |
| F2_s         | TCCGCGGGATCAGTTATAAGGT         | 1057 – 1078                              |
| Fn1_s        | GGTTGGAACGCATCAGAGGA           | 1107 – 1126                              |
| Fn2_s        | TGATTACCGCGGCGTATTTAACT        | 1141 – 1163                              |
| An1_as       | GTCGGCGCATACCCTTGAT            | 1199 – 1218                              |
| Fun2_s       | CAGTGCCGCCGCTGGCT              | 1323 – 1339                              |
| † 4_s        | GGGTAAGTTCTGCTGYTTTATG         | 1427 – 1448                              |
| † 3_as_m1    | TCYAAAAAGCAGGTRCACTCCTG        | 1461 – 1483                              |
| † 1500_s_m1  | CTGCTTTTTRGAACCAGCAGAGG        | 1472 – 1494                              |
| 1542g_s      | GARGTGACCCYGGCTGAG             | 1542 – 1559                              |
| An2_s        | TGACTGCCACCGTCGAACTC           | 1669 – 1688                              |
| † 1800_as_m1 | KGACTGGCGAGAGGCRTCAAC          | 1805 – 1826                              |

|              |                         |             |
|--------------|-------------------------|-------------|
| 1825g_as     | GCCTGGCGRGARTCATCAAA    | 1806 – 1825 |
| Fun2_as      | CAGGGGTGAGCTCATATG      | 1852 – 1869 |
| H1_s         | AGACTGTACTGCTGTTTTCCCC  | 1904 – 1925 |
| † 5_s_m1     | GCAGCCTTTTGCAGTGCYCTTTA | 1962 – 1984 |
| 2001g_s      | ACCCAGCGYCATTGCTG       | 2001 – 2018 |
| H1n_s        | GGTGGGCTGTGGTTGCAC      | 2022 – 2039 |
| † 4_as_m1    | GGGAARATACCCAACARCCCCTC | 2043 – 2065 |
| Fn1_as       | GTGTGCCCCGGGAGAAAAGG    | 2066 – 2084 |
| Fn2_as       | TTTGCGGACTCCCAGGTGT     | 2083 – 2101 |
| An2_as       | CATGTCCGGGTGTACAAAGTTCC | 2118 – 2140 |
| F1_as        | CCAGGTCCGGGTGTAAAGTGT   | 2121 – 2141 |
| A_as         | CAGGAGGTGTAGAGTGGCGT    | 2216 – 2235 |
| † ins_s_m1   | CCTGTTAGTGACRTTTGGGTGT  | 2232 – 2253 |
| F2_as        | GCACCCAAGCGTCACTAACA    | 2234 – 2253 |
| G1_s         | TAGTGACGCTTGGGTGCTTC    | 2237 – 2256 |
| G2/Gn1_s     | TCTGAGGGGTGCGTGGCTA     | 2265 – 2283 |
| Gn2_s        | TAGTAAGCCCACTAGCCCGC    | 2306 – 2325 |
| H1n_as       | TGGTGGCTTACGAACAGGGG    | 2347 – 2366 |
| † 2600_s     | ACCTATCCGGATGGGGCAAAGG  | 2403 – 2424 |
| † ins_as     | ACACCTTTGCCCCATCCGGATA  | 2406 – 2427 |
| 2418g_s      | GCYAAGGTGTAYGCAGGCTC    | 2418 – 2437 |
| H1_as        | AGGGTTGGACGCATTGACC     | 2465 – 2483 |
| 2539g_as     | GACTCCGGRAAVCGCTGG      | 2522 – 2539 |
| Gun2_s       | CCGATCATTGCTGTGG        | 2601 – 2619 |
| Gun3_s       | GCGTACCGTGAGACCTG       | 2664 – 2680 |
| Gun2_as      | AGTGGGTAAGCGGCTGTG      | 2693 – 2710 |
| B_s          | CTACCCACTCCTCGGCTC      | 2702 – 2719 |
| Bn1_s        | ACCAAGTTCCCGTTAGCCTCAG  | 2728 – 2749 |
| 2757g_s      | GCCTGGGARCGTAACCAYCGC   | 2757 – 2777 |
| † 3150_s_m1  | TATCAGTTYACTGCTGGGGTCC  | 2964 – 2985 |
| 2986g_as     | GGGACCCCGGCRGTRAAC      | 2969 – 2986 |
| † 3200_as_m1 | TGCTGTATAGARCGCGACTTCC  | 2995 – 3016 |
| 3034g_as     | ACAACRTCAACATCSCCCTG    | 3015 – 3034 |
| Bn1_as       | TGGTTTGGGTCGCCGAGAAG    | 3207 – 3226 |
| I1_s         | TTCAGACTACTAGCCGCGTT    | 3364 – 3383 |
| C/Bn2_s      | TCTGGAATGAGCCTGCCATTGG  | 3397 – 3418 |
| I1n_s        | CGCAATCACCGTCCATGAGG    | 3464 – 3483 |
| 3553g_s      | CYCGYGACATGCCATCG       | 3553 – 3570 |
| Gun3_as      | ACACATTTCTCTGTGTGGC     | 3583 – 3601 |
| † 8_s        | CCCCCGCTTGTTWCGTGAGGT   | 3613 – 3634 |
| 3800_as_m1   | ACCRACCTCACGTAACAAGCCG  | 3617 – 3638 |
| 3700g_as     | GGGCGRTGRTGGCCCACT      | 3683 – 3700 |
| Bn2_as       | ACCGTGAGCTCCTGAGGCAT    | 3873 – 3892 |
| Cn1_s        | AGCTCACGGTGTCTGATAGC    | 3883 – 3902 |

|            |                            |      |   |      |
|------------|----------------------------|------|---|------|
| Gun4_as    | TGTCCGTGAGCTCAAAAACC       | 3908 | – | 3927 |
| Gn1_as     | CTGACTAGGGGCCGCCATTC       | 3940 | – | 3959 |
| G1_as      | CCTCATACAACCTTCGTCCGGC     | 4000 | – | 4020 |
| Gn2_as     | ACATGTGGTGGCCTGGACC        | 4076 | – | 4094 |
| † 9_s_m1   | CYACYACGTGTGAGTTRTATGAG    | 4083 | – | 4106 |
| † 8_as     | CCATCCTGACCTTTCTCCACCAT    | 4119 | – | 4141 |
| G2_as      | CGTCCTGGCCTTTCTCAACC       | 4121 | – | 4140 |
| 4143g_as   | AGCCRTCCTGRCCCTTCTCCAC     | 4122 | – | 4143 |
| 4276g_as   | CTCCARGCCGARATGCCC         | 4259 | – | 4276 |
| Iln_as     | GGGCACAGAAGGTCTTACTCCA     | 4272 | – | 4293 |
| I1_as      | AGGTGGGAGTAGGGCTAAGA       | 4330 | – | 4349 |
| B/Cn1_as   | CCGTAGAAAATATTAGGCGGGAG    | 4341 | – | 4363 |
| Cn2_s      | CTGTCTCAGGGGCAGGTTCA       | 4396 | – | 4415 |
| J1_s       | AGCCGGCTCTAGTATGGTCT       | 4406 | – | 4425 |
| J1n_s      | GCGTTATCATGGAAGAGTGTGGC    | 4486 | – | 4508 |
| † 10_s_m1  | CTYAAGGGATTTTGAAGAARCA     | 4581 | – | 4603 |
| † 9_as_m1  | GCCATRTTCCARACAGTRTTCCA    | 4629 | – | 4651 |
| J1n_as     | TCCCCTTTGAACGCTGCTACT      | 4688 | – | 4708 |
| J1_as      | CCACAACCAGCAATCAAGGC       | 4758 | – | 4777 |
| Cn2_as     | TTCTCAGACAGCCGGCCG         | 4874 | – | 4891 |
| D_s        | AGAAGAACTGGGGCCCTGGG       | 4888 | – | 4907 |
| C_as       | CACATACCTGCGCAACATTCGT     | 4962 | – | 4983 |
| Dn1_s      | ACGAATGTTGCGCAGGTATGT      | 4962 | – | 4982 |
| † 11_s-neu | CGGCAGTGGTTTCTGGRGTGAC     | 5283 | – | 5304 |
| † 10_as    | GCGAAGGGCTGAGAATCAACCC     | 5306 | – | 5327 |
| Dn1_as     | TCAACATCAGGTACAGGGGCT      | 5529 | – | 5549 |
| K1_s       | TCTATATGCCGCCCCGCTC        | 5634 | – | 5652 |
| E/Dn2_s    | AAACCCTCTGCTGCCCCTTC       | 5652 | – | 5671 |
| K1n_s      | GGCAACTGAGGCGTCTAATT       | 5697 | – | 5716 |
| † 12_s     | CTAATTATGCCCAGTAYCGGGTTG   | 5711 | – | 5734 |
| † 11_as    | GTAATAGAGTTCATRTCAACAGA    | 5833 | – | 5855 |
| K1n_as     | ACCCTGATTGCGGTAATGGA       | 5924 | – | 5943 |
| K1_as      | AGGGGAGCCATGAATACAAAGC     | 6003 | – | 6024 |
| En1_s      | GGGCGCTTGGA CTCTTGAT       | 6056 | – | 6075 |
| 6062_s     | TGGGGCTTCTCGATTTTGCAC      | 6062 | – | 6082 |
| Dn2_as     | TGCTTGTATACCGGGACACACG     | 6127 | – | 6148 |
| 6196_s     | ACA ACTACTGCAGCCACACGT     | 6196 | – | 6216 |
| † 13_s     | CTCACACTCTTTAATCTTGCTGA    | 6280 | – | 6302 |
| † 12_as_m1 | AACTGTCCCCRGCCGACGAAAT     | 6334 | – | 6356 |
| § 3'-GS2_s | TCCCGCCCAGTTGTCTCAGCCAATGG | 6364 | – | 6389 |
| 6387_as    | ATTGGCTGAGACGACTGGGC       | 6368 | – | 6387 |
| 6525_as    | CCGATCCTGTT CATGCTGGTTG    | 6504 | – | 6525 |
| § 3'-GS1_s | ACCCCTTCGCCTGCCCTTCTCG     | 6529 | – | 6551 |
| D/En1_as   | CGAGAAGGGGCAGGCGAAG        | 6533 | – | 6551 |

|              |                                               |                          |
|--------------|-----------------------------------------------|--------------------------|
| § 3'-GSn2_s  | TTGTGGCTCTCTCTCACTGCTGCCGA                    | 6583 – 6608              |
| En2_s        | GCCGCCGAGTATGACCAGAC                          | 6601 – 6620              |
| § 3'-GS4_s   | TGTTAATGTGGCGACGGGTGCTCAGG                    | 6672 – 6697              |
| § 3'-GS1n_s  | GCTGTCGCCCCGTTCCCTTGACTGGTC                   | 6697 – 6722              |
| § 3'-GSn4_s  | GACGGTCGGCCTCTCACTAC                          | 6736 – 6755              |
| † 14_s_m1    | GGAAGTTATCYTTTTGGGAGGC                        | 6800 – 6821              |
| § 3'-GS3_s   | TTTTGGGAGGCTGGCACTACTAAGGC                    | 6811 – 6836              |
| † 13_as_m1   | AGTTGTGTTTAAATTATASGGGTA                      | 6841 – 6864              |
| § 3'-GSn3_s  | CCCTGAGTGCCGTAATCTTGCCCTAC                    | 7053 – 7078              |
| En2_as       | CACACCCCTGCAAACCGAGA                          | 7068 – 7087              |
| E_as         | TCAGCAATAGTAGACTGGAAGGC                       | 7087 – 7109              |
| † 14_as_m1   | TTTTTTTTTTTTCCWGGGAGCGCG                      | 7213 – 7236              |
| ‡ 3'-RACE_as | AAGCAGTGGTATCAACGCAGAGTAC(T) <sub>30</sub> VN | on 3' poly(A) tail       |
| ‡ LUP        | CTAATACGACTCACTATAGGGCAAGCAGTGGTATCAACGCAGAGT | on 5'-RACEs or 3'-RACEas |
| ‡ SUP        | CTAATACGACTCACTATAGGGC                        | on LUP                   |
| ‡ NUP        | AAGCAGTGGTATCAACGCAGAGT                       | on LUP                   |

**Table S4.** Positions and nucleotide sequences of primers used for whole genome sequencing.

† Primers based on Johne et al. <sup>1</sup>; m1, modified; s, sense; as, antisense; ‡ primers based on BD SMART™ RACE cDNA Amplification Kit User Manual; § primers designed according to recommendations of BD SMART™ RACE cDNA Amplification Kit User Manual.

## Supplementary Reference

1. Johne R, Reetz J, Ulrich RG, et al. An ORF1-rearranged hepatitis E virus derived from a chronically infected patient efficiently replicates in cell culture. *Journal of Viral Hepatitis*. 2014;21(6):447-456. doi:10.1111/jvh.12157.
