# Supplementary material for: Isolation of Subtype 3c, 3e and 3f-Like Hepatitis E Virus Strains Stably Replicating to High Viral Loads in an Optimized Cell Culture System
Source: MDPI journal article supplement (doi:10.3390/v11060483), 2019-05-28
Supplement: s1 [file s1]

# Sequenced genome segments of subtype 3e strain 14-22707

| Sequence Segment                                             | Location<br>(on 14-16753 genome,<br>nested Primer excluded) | First round PCR                       | Primer<br>Nested PCR | Sequencing                                        |
|--------------------------------------------------------------|-------------------------------------------------------------|---------------------------------------|----------------------|---------------------------------------------------|
| 5'n_2n<br>T <sub>Af</sub> = 68 °C<br>T <sub>An</sub> = 68 °C | -7 – 315                                                    | 5'-RACE_s<br>5'-GS2n_as<br>LUP<br>SUP | NUP<br>5'-GS4_as     | Sn_s<br>5'-GS4n_as                                |
| 5'n_4<br>T <sub>Af</sub> = 58 °C<br>T <sub>An</sub> = 58 °C  | -7 – 175                                                    | 5'-RACE_s<br>5'-GS4_as<br>LUP<br>SUP  | NUP<br>5'-GS4n_as    | 1_s<br>5'-GS4n_as                                 |
| Sn<br>T <sub>Af</sub> = 58 °C<br>T <sub>An</sub> = 58 °C     | 132 – 565                                                   | S_s<br>S_as                           | Sn_s<br>Sn_as        | Sn_s<br>2_s<br>1_as<br>Sn_as                      |
| 2n_12<br>T <sub>Af</sub> = 58 °C<br>T <sub>An</sub> = 58 °C  | 473 – 1031                                                  | 1_s<br>3_as_m1                        | 2_s<br>2_as_m1       | 2_s<br>2_as_m1                                    |
| A1<br>T <sub>Af</sub> = 58 °C<br>T <sub>An</sub> = 58 °C     | 750 – 1198                                                  | A_s<br>A_as                           | An1_s<br>An1_as      | An1_s<br>An1_as                                   |
| Fn11<br>T <sub>Af</sub> = 58 °C<br>T <sub>An</sub> = 58 °C   | 1127 – 2065                                                 | F1_s<br>F1_as                         | Fn1_s<br>Fn1_as      | Fn1_s<br>Fun2_s<br>3_as_m1<br>Fun2_as<br>Fn1_as   |
| Fn22<br>T <sub>Af</sub> = 58 °C<br>T <sub>An</sub> = 58 °C   | 1164 – 2082                                                 | F2_s<br>F2_as                         | Fn2_s<br>Fn2_as      | Fn2_s<br>4_s<br>3_as_m1<br>Fun2_as<br>Fn2_as      |
| 3n_12<br>T <sub>Af</sub> = 58 °C<br>T <sub>An</sub> = 58 °C  | 1985 – 2405                                                 | 1500_s_m1<br>3200_as_m1               | 5_s_m1<br>ins_as     | ins_as                                            |
| Hn11<br>T <sub>Af</sub> = 58 °C<br>T <sub>An</sub> = 58 °C   | 2040 – 2346                                                 | H1_s<br>H1_as                         | H1n_s<br>H1n_as      | H1n_s<br>F2_as<br>H1n_as                          |
| Gn11<br>T <sub>Af</sub> = 58 °C<br>T <sub>An</sub> = 58 °C   | 2284 – 3939                                                 | G1_s<br>G1_as                         | G2/Gn1_s<br>Gn1_as   | G2/Gn1_s<br>Gun2s<br>Gun2_as<br>Bn1_as<br>Gun3_as |

|                                                             |             |                        |                      |                                                                      |
|-------------------------------------------------------------|-------------|------------------------|----------------------|----------------------------------------------------------------------|
| Gn22<br>T <sub>Af</sub> = 68 °C<br>T <sub>An</sub> = 68 °C  | 2326 – 4075 | G2/Gn1_s<br>G2_as      | Gn2_s<br>Gn2_as      | Gn1_as<br>Gn2_s<br>Gun3_s<br>Gun2_as<br>Gun3_as<br>Gun4_as<br>Gn2_as |
| In11<br>T <sub>Af</sub> = 58 °C<br>T <sub>An</sub> = 58 °C  | 3484 – 4271 | I1_s<br>I1_as          | I1n_s<br>I1n_as      | I1n_s<br>8_s<br>9_s_m1<br>Gun3_as<br>Gn1_as<br>Gn2_as<br>I1n_as      |
| C1<br>T <sub>Af</sub> = 58 °C<br>T <sub>An</sub> = 68 °C    | 3903 – 4340 | C/Bn2_s<br>C_as        | Cn1_s<br>B/Cn1_as    | B/Cn1_as                                                             |
| 6n_12<br>T <sub>Af</sub> = 58 °C<br>T <sub>An</sub> = 58 °C | 4107 – 4628 | 8_s<br>10_as           | 9_s_m1<br>9_as_m1    | 9_s_m1<br>9_as_m1                                                    |
| Jn11<br>T <sub>Af</sub> = 58 °C<br>T <sub>An</sub> = 58 °C  | 4509 – 4687 | J1_s<br>J1_as          | J1n_s<br>J1n_as      | J1n_s<br>9_as_m1<br>J1n_as                                           |
| 7n_12<br>T <sub>Af</sub> = 58 °C<br>T <sub>An</sub> = 58 °C | 4604 – 5832 | 9_s_m1<br>12_as_m1     | 10_s_m1<br>11_as     | 10_s_m1<br>Dn1_s<br>11_s-neu<br>10_as<br>11_as                       |
| 6n_7<br>T <sub>Af</sub> = 58 °C<br>T <sub>An</sub> = 58 °C  | 5305 – 6333 | 10_s_m1<br>13_as_m1    | 11_s-neu<br>12_as_m1 | 11_s-neu<br>12_s<br>11_as<br>12_as_m1                                |
| Kn11<br>T <sub>Af</sub> = 58 °C<br>T <sub>An</sub> = 58 °C  | 5717 – 5923 | K1_s<br>K1_as          | K1n_s<br>K1n_as      | K1n_s<br>12_s<br>11_as<br>K1n_as                                     |
| 8n_12<br>T <sub>Af</sub> = 58 °C<br>T <sub>An</sub> = 58 °C | 6303 – 6840 | 12_s<br>14_as_m1       | 13_s<br>13_as_m1     | 13_s<br>13_as_m1                                                     |
| 9n_12<br>T <sub>Af</sub> = 58 °C<br>T <sub>An</sub> = 58 °C | 6822 – 7212 | 13_s<br>14_as_m1       | 14_s_m1<br>14_as_m1  | 14s_m1<br>14_as_m1                                                   |
| 3'n_2<br>T <sub>Af</sub> = 68 °C                            | 6609 – 7256 | 3'-GS2_s<br>3'-RACE_as | 3'-GSn2_s<br>NUP     | 3'-GSn2_s<br>3'-GS3_s                                                |

|                         |             |  |            |           |           |
|-------------------------|-------------|--|------------|-----------|-----------|
| T <sub>An</sub> = 68 °C |             |  | LUP<br>SUP |           | 3'-GSn3_s |
| 3'n                     | 6723 – 7256 |  | 3'-GS1_s   | 3'-GS1n_s | 14_s_m1   |
| T <sub>Af</sub> = 68 °C |             |  | 3'-RACE_as | NUP       | 14_as_m1  |
| T <sub>An</sub> = 68 °C |             |  | LUP<br>SUP |           |           |
| 3'n_3                   | 7079 – 7256 |  | 3'-GS3_s   | 3'-GSn3_s | 3'-GSn3_s |
| T <sub>Af</sub> = 68 °C |             |  | 3'-RACE_as | NUP       | 14_as_m1  |
| T <sub>An</sub> = 68 °C |             |  | LUP<br>SUP |           |           |

**Table S2.** Summary of overlapping genome regions sequenced from subtype 3e strain 14-22707. First round PCR primers were added to the RT-mix which was introduced into the first round PCR-mix after transcription. Smart Primer were added to the smart cDNA-mix which was partly used in the first round PCR-mix after smart cDNA-synthesis. T<sub>Af</sub>, annealing temperature of first round PCR; T<sub>An</sub>, annealing temperature of nested PCR.
