# Supplementary material for: Isolation of Subtype 3c, 3e and 3f-Like Hepatitis E Virus Strains Stably Replicating to High Viral Loads in an Optimized Cell Culture System
Source: MDPI journal article supplement (doi:10.3390/v11060483), 2019-05-28
Supplement: s1 [file s1]

# Sequenced genome segments of subtype 3c strain 14-16753

| Sequence Segment                                            | Location<br>(on 14-16753 genome,<br>nested Primer excluded) | First round PCR                      | Primer<br>Nested PCR   | Sequencing                                                            |
|-------------------------------------------------------------|-------------------------------------------------------------|--------------------------------------|------------------------|-----------------------------------------------------------------------|
| 5'n<br>T <sub>Af</sub> = 68 °C<br>T <sub>An</sub> = 68 °C   | -7 – 483                                                    | 5'-RACE_s<br>5'-GS1_as<br>LUP<br>SUP | NUP<br>5'-GS1n_as      | NUP<br>1_s<br>S_s<br>Sn_s<br>289_as<br>393_as<br>440_as<br>5'-GS1n_as |
| Sn<br>T <sub>Af</sub> = 58 °C<br>T <sub>An</sub> = 58 °C    | 132 – 565                                                   | S_s<br>S_as                          | Sn_s<br>Sn_as          | 2_s<br>1_as<br>Sn_as                                                  |
| 2n_12<br>T <sub>Af</sub> = 58 °C<br>T <sub>An</sub> = 58 °C | 473 – 1031                                                  | 1_s<br>3_as_m1                       | 2_s<br>2_as_m1         | 2_s<br>2_as_m1                                                        |
| A1<br>T <sub>Af</sub> = 58 °C<br>T <sub>An</sub> = 58 °C    | 750 – 1198                                                  | A_s<br>A_as                          | An1_s<br>An1_as        | An1_s<br>3_s<br>2_as_m1<br>An1_as                                     |
| 2n_7<br>T <sub>Af</sub> = 58 °C<br>T <sub>An</sub> = 58 °C  | 999 – 2042                                                  | 2_s<br>3200_as_m1                    | 3_s<br>4_as_m1         | 3_s<br>4_s<br>1500s_m1<br>3_as_m1<br>1800_as_m1<br>4_as_m1            |
| A2<br>T <sub>Af</sub> = 68 °C<br>T <sub>An</sub> = 68 °C    | 1689 – 2117                                                 | A_s<br>Aas                           | An2_s<br>An2_as        | An2_s<br>5_s_m1<br>1800_as_m1<br>4_as_m1<br>An2_as                    |
| 3n_12<br>T <sub>Af</sub> = 58 °C<br>T <sub>An</sub> = 58 °C | 1985 – 2405                                                 | 1500_s_m1<br>3200_as_m1              | 5_s_m1<br>ins_as       | 5_s_m1<br>ins_s_m1<br>ins_as                                          |
| 4n_12<br>T <sub>Af</sub> = 58 °C<br>T <sub>An</sub> = 58 °C | 2254 – 2994                                                 | 5_s_m1<br>3800_as_m1                 | ins_s_m1<br>3200_as_m1 | ins_s_m1<br>2600s<br>ins_as<br>3200_as_m1                             |
| B1<br>T <sub>Af</sub> = 58 °C<br>T <sub>An</sub> = 58 °C    | 2750 – 3206                                                 | B_s<br>B/Cn1_as                      | Bn1_s<br>Bn1_as        | Bn1_s<br>3150_s_m1<br>3200_as_m1                                      |

|                                                             |             |                     |                      |                                                  |
|-------------------------------------------------------------|-------------|---------------------|----------------------|--------------------------------------------------|
| 5n_12<br>T <sub>Af</sub> = 68 °C<br>T <sub>An</sub> = 68 °C | 2986 – 4118 | 2600_s<br>9_as_m1   | 3150_s_m1<br>8_as    | Bn1_as<br>3150_s_m1<br>8_s<br>3800_as_m1<br>8_as |
| B2<br>T <sub>Af</sub> = 58 °C<br>T <sub>An</sub> = 68 °C    | 3419 – 3872 | B_s<br>B/Cn1_as     | C/Bn2_s<br>Bn2_as    | C/Bn2_s<br>8_s<br>3800_as_m1<br>Bn2_as           |
| C1<br>T <sub>Af</sub> = 58 °C<br>T <sub>An</sub> = 68 °C    | 3903 – 4340 | C/Bn2_s<br>C_as     | Cn1_s<br>B/Cn1_as    | Cn1_s<br>9_s_m1<br>8_as<br>B/Cn1_as              |
| 6n_12<br>T <sub>Af</sub> = 58 °C<br>T <sub>An</sub> = 58 °C | 4107 – 4628 | 8_s<br>10_as        | 9_s_m1<br>9_as_m1    | 9_s_m1<br>9_as_m1                                |
| C2<br>T <sub>Af</sub> = 58 °C<br>T <sub>An</sub> = 58 °C    | 4416 – 4873 | C/Bn2_s<br>C_as     | Cn2_s<br>Cn2_as      | Cn2_s<br>10_s_m1<br>9_as_m1<br>Cn2_as            |
| 7n_12<br>T <sub>Af</sub> = 58 °C<br>T <sub>An</sub> = 58 °C | 4604 – 5832 | 9_s_m1<br>12_as_m1  | 10_s_m1<br>11_as     | 10s_m1<br>11_s-neu<br>10_as<br>11_as             |
| D1<br>T <sub>Af</sub> = 58 °C<br>T <sub>An</sub> = 68 °C    | 4983 – 5528 | D_s<br>D/En1_as     | Dn1_s<br>Dn1_as      | Dn1_s<br>11_s-neu<br>10_as<br>Dn1_as             |
| 6n_7<br>T <sub>Af</sub> = 58 °C<br>T <sub>An</sub> = 58 °C  | 5305 – 6333 | 10_s_m1<br>13_as_m1 | 11_s-neu<br>12_as_m1 | 11_s-neu<br>12_s<br>11_as<br>12_as_m1            |
| D2<br>T <sub>Af</sub> = 58 °C<br>T <sub>An</sub> = 58 °C    | 5672 – 6126 | D_s<br>D/En1_as     | E/Dn2_s<br>Dn2_as    | E/Dn2_s<br>12_s<br>11_as                         |
| E1<br>T <sub>Af</sub> = 58 °C<br>T <sub>An</sub> = 68 °C    | 6076 – 6532 | E/Dn2_s<br>E_as     | En1_s<br>D/En1_as    | En1_s<br>13_s<br>12_as_m1<br>D/En1_as            |
| 8n_12<br>T <sub>Af</sub> = 58 °C<br>T <sub>An</sub> = 58 °C | 6303 – 6840 | 12_s<br>14_as_m1    | 13_s<br>13_as_m1     | 13_s<br>13_as_m1                                 |
| E2<br>T <sub>Af</sub> = 58 °C                               | 6621 – 7067 | E/Dn2_s<br>E_as     | En2_s<br>En2_as      | En2_s<br>14_s_m1                                 |

|                         |             |            |           |           |
|-------------------------|-------------|------------|-----------|-----------|
| T <sub>An</sub> = 68 °C |             |            |           | 13_as_m1  |
|                         |             |            |           | En2_as    |
| 9n_12                   | 6822 – 7212 | 13_s       | 14_s_m1   | 14_s_m1   |
| T <sub>Af</sub> = 58 °C |             | 14_as_m1   | 14_as_m1  | 14_as_m1  |
| T <sub>An</sub> = 58 °C |             |            |           |           |
| 3'n                     | 6723 – 7256 | 3'-GS1_s   | 3'-GS1n_s | 3'-GS1n_s |
| T <sub>Af</sub> = 68 °C |             | 3'-RACE_as | NUP       | 14_s_m1   |
| T <sub>An</sub> = 68 °C |             | LUP        |           | 13_as_m1  |
|                         |             | SUP        |           | 14_as_m1  |

**Table S1.** Summary of overlapping genome regions sequenced from subtype 3c strain 14-16753. First round PCR primers were added to the RT-mix which was completely introduced into the first round PCR-mix after transcription. Smart Primer were added to the smart cDNA-mix which was partly used in the first round PCR-mix after smart cDNA-synthesis. T<sub>Af</sub>, annealing temperature of first round PCR; T<sub>An</sub>, annealing temperature of nested PCR.
