# Supplementary material for: Isolation of Subtype 3c, 3e and 3f-Like Hepatitis E Virus Strains Stably Replicating to High Viral Loads in an Optimized Cell Culture System
Source: MDPI journal article supplement (doi:10.3390/v11060483), 2019-05-28
Supplement: s1 [file s1]

## Sequenced genome segments of subtype 3f-like strain 15-22016

| Sequence Segment                                             | Location<br>(on 14-16753 genome,<br>nested Primer excluded) | First round PCR                      | Primer<br>Nested PCR | Sequencing                                                          |
|--------------------------------------------------------------|-------------------------------------------------------------|--------------------------------------|----------------------|---------------------------------------------------------------------|
| 5'n_5n<br>T <sub>Af</sub> = 68 °C<br>T <sub>An</sub> = 58 °C | -7 – 138                                                    | 5'-RACE_s<br>5'-GS5_as<br>LUP<br>SUP | NUP<br>5'-GS5n_as    | 1_s<br>5'-GS5n_as                                                   |
| Sn<br>T <sub>Af</sub> = 58 °C<br>T <sub>An</sub> = 58 °C     | 132 – 565                                                   | S_s<br>S_as                          | Sn_s<br>Sn_as        | 1_as                                                                |
| 427n<br>T <sub>Af</sub> = 68 °C<br>T <sub>An</sub> = 58 °C   | 445 – 852                                                   | 409_s<br>897_as                      | 427_s<br>874_as      | 427_s<br>560g_s<br>An1_s<br>874_as                                  |
| A1<br>T <sub>Af</sub> = 58 °C<br>T <sub>An</sub> = 68 °C     | 750 – 1198                                                  | A_s<br>A_as                          | An1_s<br>An1_as      | An1_s<br>3_s<br>2_as_m1<br>An1_as                                   |
| 902n<br>T <sub>Af</sub> = 58 °C<br>T <sub>An</sub> = 58 °C   | 920 – 1805                                                  | 560g_s<br>3034g_as                   | 902g_s<br>1825g_as   | 902g_s<br>3_s<br>1542g_s<br>3_as_m1<br>1825g_as                     |
| 1542n<br>T <sub>Af</sub> = 68 °C<br>T <sub>An</sub> = 68 °C  | 1560 – 2521                                                 | 560g_s<br>3034g_as                   | 1542g_s<br>2539g_as  | 1542g_s<br>1825g_as<br>2539g_as                                     |
| 2001n<br>T <sub>Af</sub> = 58 °C<br>T <sub>An</sub> = 58 °C  | 2019 – 2968                                                 | 560g_s<br>3034g_as                   | 2001g_s<br>2986g_as  | 2001g_s<br>2418g_s<br>2757g_s<br>2539g_as                           |
| 2418n<br>T <sub>Af</sub> = 68 °C<br>T <sub>An</sub> = 68 °C  | 2438 – 3014                                                 | 2001g_s<br>4276g_as                  | 2418g_s<br>3034g_as  | 2418g_s<br>2757g_s<br>2539g_as<br>2986g_as<br>3034g_as              |
| 2757n<br>T <sub>Af</sub> = 58 °C<br>T <sub>An</sub> = 68 °C  | 2778 – 3682                                                 | 2001g_s<br>4276g_as                  | 2757g_s<br>3700g_as  | 2757g_s<br>3150_s_m1<br>3553g_s<br>2986g_as<br>3034g_as<br>3700g_as |
| 3553n                                                        | 3571 – 4121                                                 | 2001g_s                              | 3553g_s              | 3553g_s                                                             |

|                                                             |             |  |                                      |                      |                                                              |
|-------------------------------------------------------------|-------------|--|--------------------------------------|----------------------|--------------------------------------------------------------|
| T <sub>Af</sub> = 68 °C<br>T <sub>An</sub> = 68 °C          |             |  | 4276g_as                             | 4143g_as             | 8_as<br>4143g_as                                             |
| C1<br>T <sub>Af</sub> = 58 °C<br>T <sub>An</sub> = 68 °C    | 3903 – 4340 |  | C/Bn2_s<br>C_as                      | Cn1_s<br>B/Cn1_as    | Cn1_s<br>9_s_m1<br>B/Cn1_as                                  |
| 6n_12<br>T <sub>Af</sub> = 58 °C<br>T <sub>An</sub> = 58 °C | 4107 – 4628 |  | 8_s<br>10_as                         | 9_s_m1<br>9_as_m1    | 9_s_m1<br>B/Cn1_as<br>9_as_m1                                |
| 7n_12<br>T <sub>Af</sub> = 58 °C<br>T <sub>An</sub> = 58 °C | 4604 – 5832 |  | 9_s_m1<br>12_as_m1                   | 10_s_m1<br>11_as     | 10s_m1<br>D_s<br>Dn1_s<br>11_s-neu<br>C_as<br>10_as<br>11_as |
| 6n_7<br>T <sub>Af</sub> = 58 °C<br>T <sub>An</sub> = 58 °C  | 5305 – 6333 |  | 10_s_m1<br>13_as_m1                  | 11_s-neu<br>12_as_m1 | 11_s-neu<br>12_as_m1                                         |
| 6196n<br>T <sub>Af</sub> = 58 °C<br>T <sub>An</sub> = 58 °C | 6217 – 6367 |  | 6062_s<br>6525_as                    | 6196_s<br>6387_as    | 6196_s<br>12_as_m1<br>6387_as                                |
| 8n_12<br>T <sub>Af</sub> = 58 °C<br>T <sub>An</sub> = 58 °C | 6303 – 6840 |  | 12_s<br>14_as_m1                     | 13_s<br>13_as_m1     | 13_s<br>13_as_m1                                             |
| 3'n_4<br>T <sub>Af</sub> = 58 °C<br>T <sub>An</sub> = 58 °C | 6756 – 7256 |  | 3'-GS4_s<br>3'-RACE_as<br>LUP<br>SUP | 3'-GSn4_s<br>NUP     | 3'-GSn4s<br>3'-GS3_s<br>3'-GSn3_s<br>14_as_m1                |

**Table S3.** Summary of overlapping genome regions sequenced from subtype 3f-like strain 15-22016. First round PCR primers were added to the RT-mix which was introduced into the first round PCR-mix after transcription. Smart Primer were added to the smart cDNA-mix which was partly used in the first round PCR-mix after smart cDNA-synthesis. T<sub>Af</sub>, annealing temperature of first round PCR; T<sub>An</sub>, annealing temperature of nested PCR.
